# Supplementary material for: Impact of Policy Instruments in the Implementation of Renewable Sources of Energy in Selected European Countries
Source: MDPI journal article supplement (doi:10.3390/su14106314), 2022-05-22
Supplement: s1 [file s1]

Archive with 1 entries (1 files):
- sustainability-1696183-supplementary.pdf
