# Supplementary material for: Impact of Policy Instruments in the Implementation of Renewable Sources of Energy in Selected European Countries
Source: MDPI journal article supplement (doi:10.3390/su14106314), 2022-05-22
Supplement: s1 [file s1 › sustainability-1696183-supplementary.pdf]

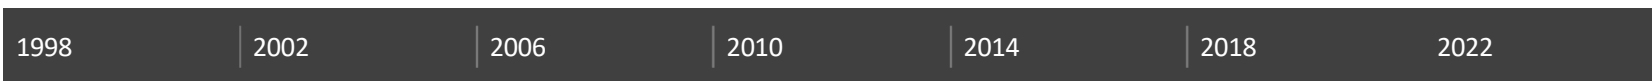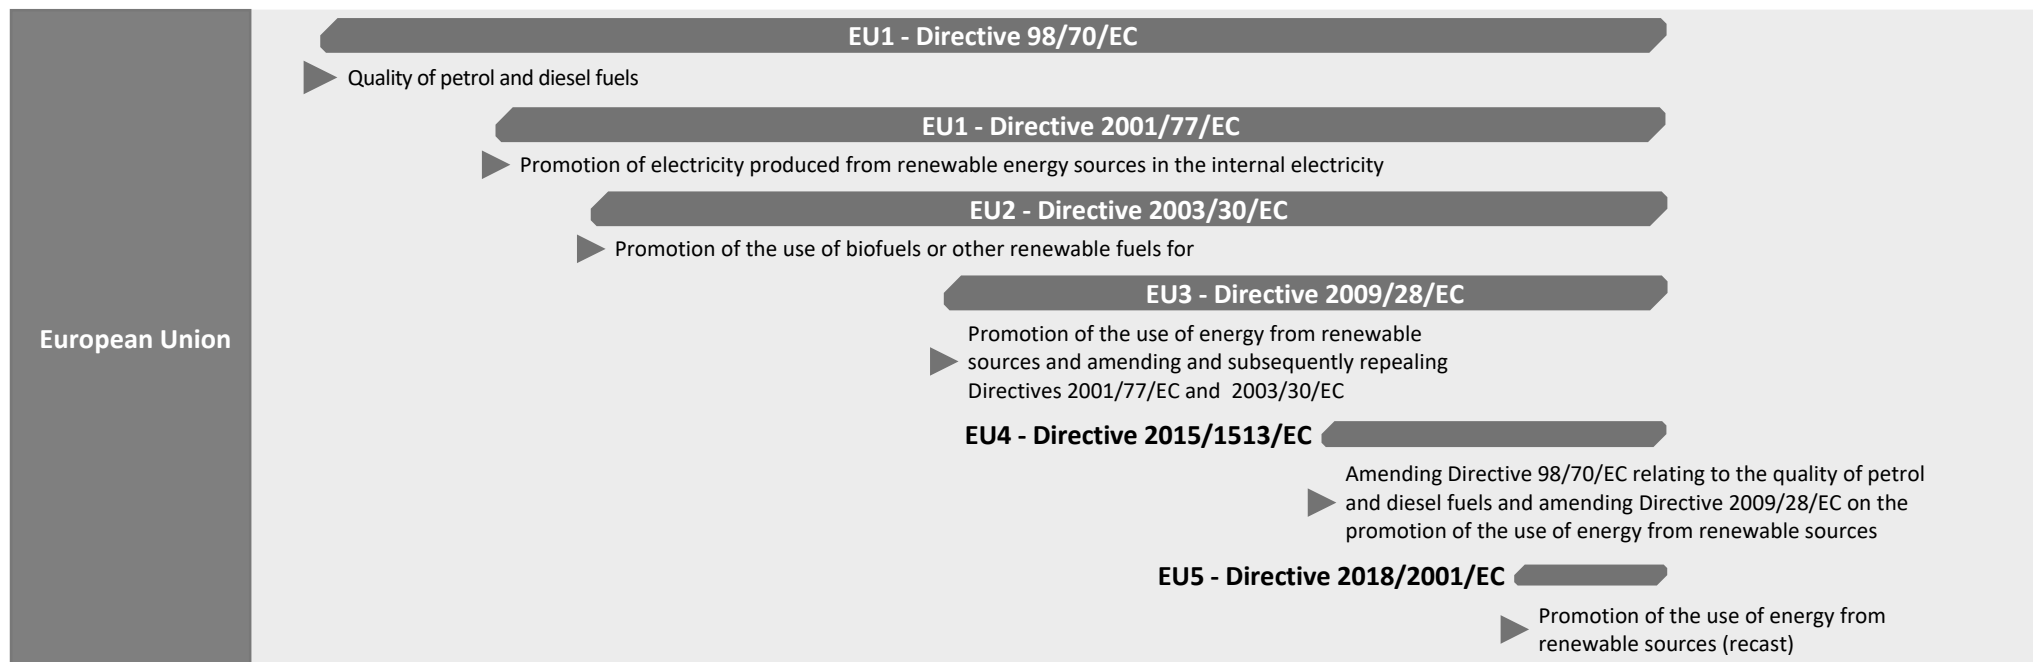

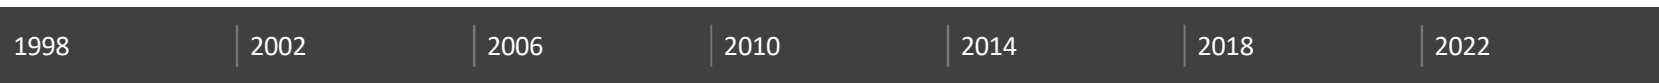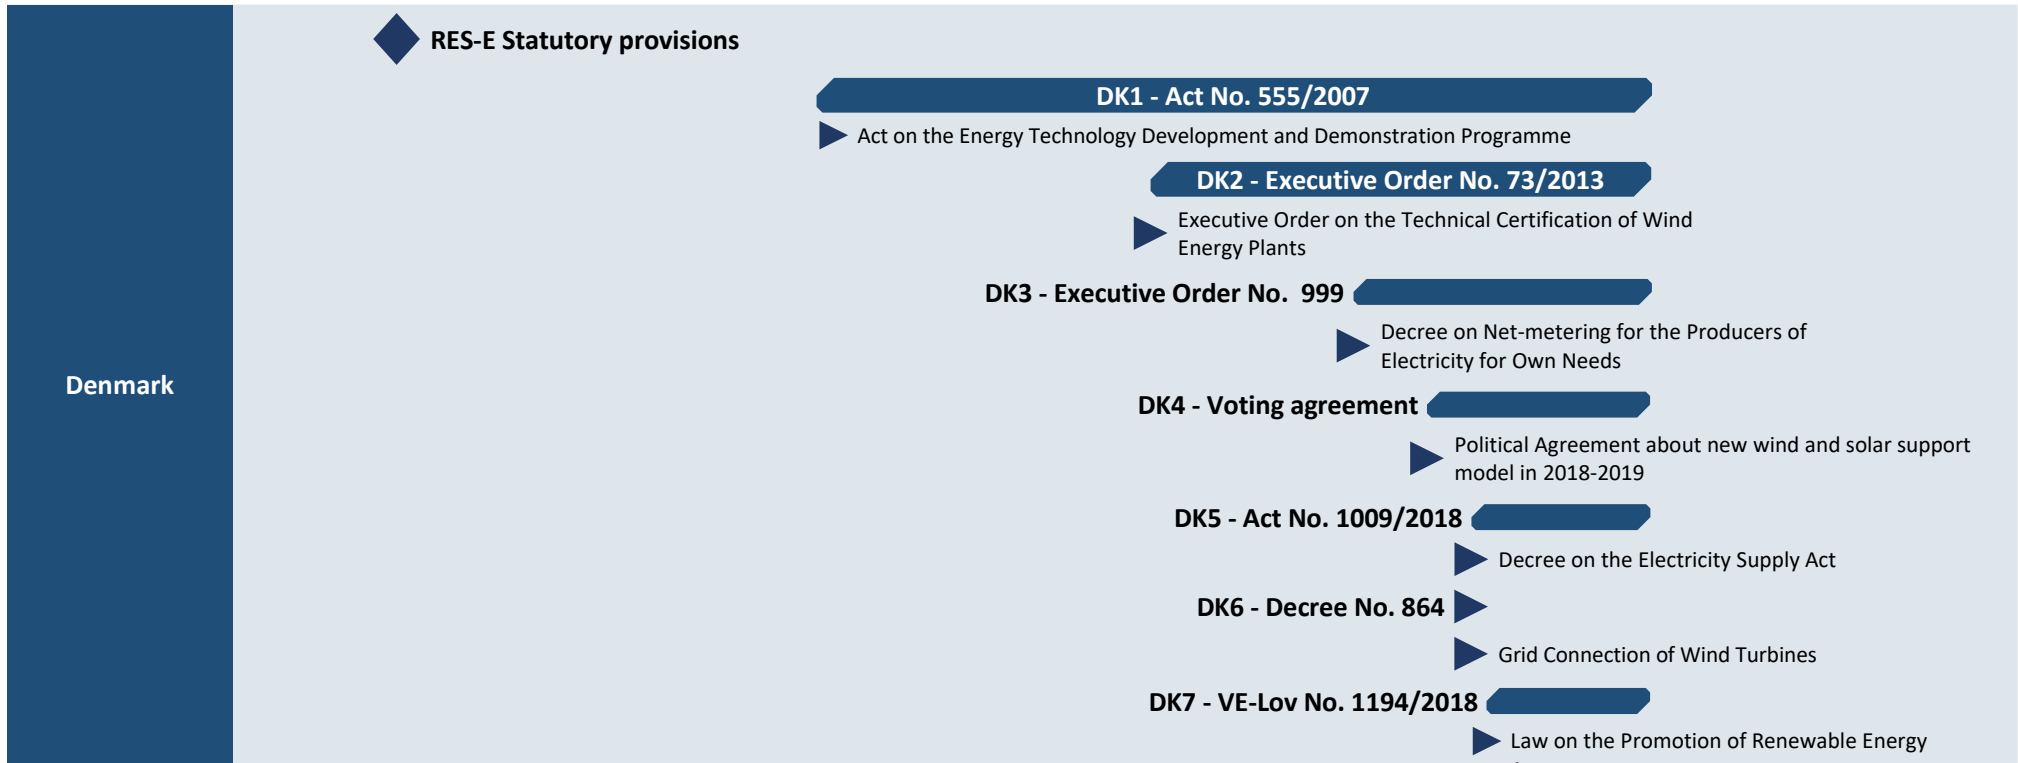

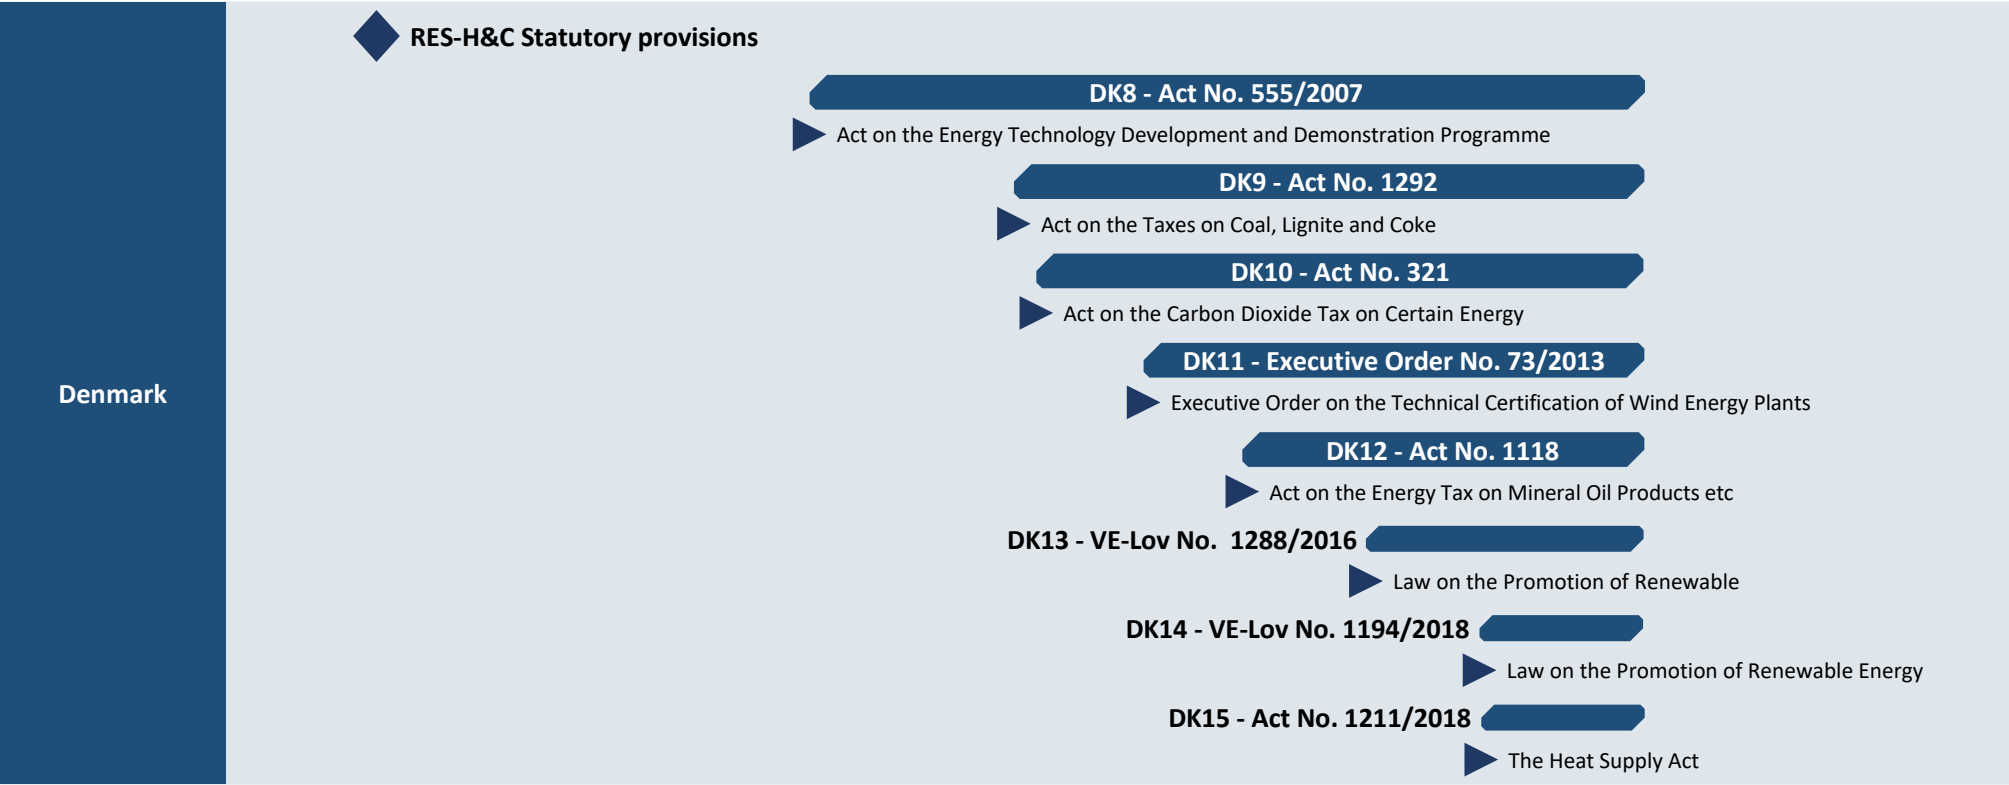

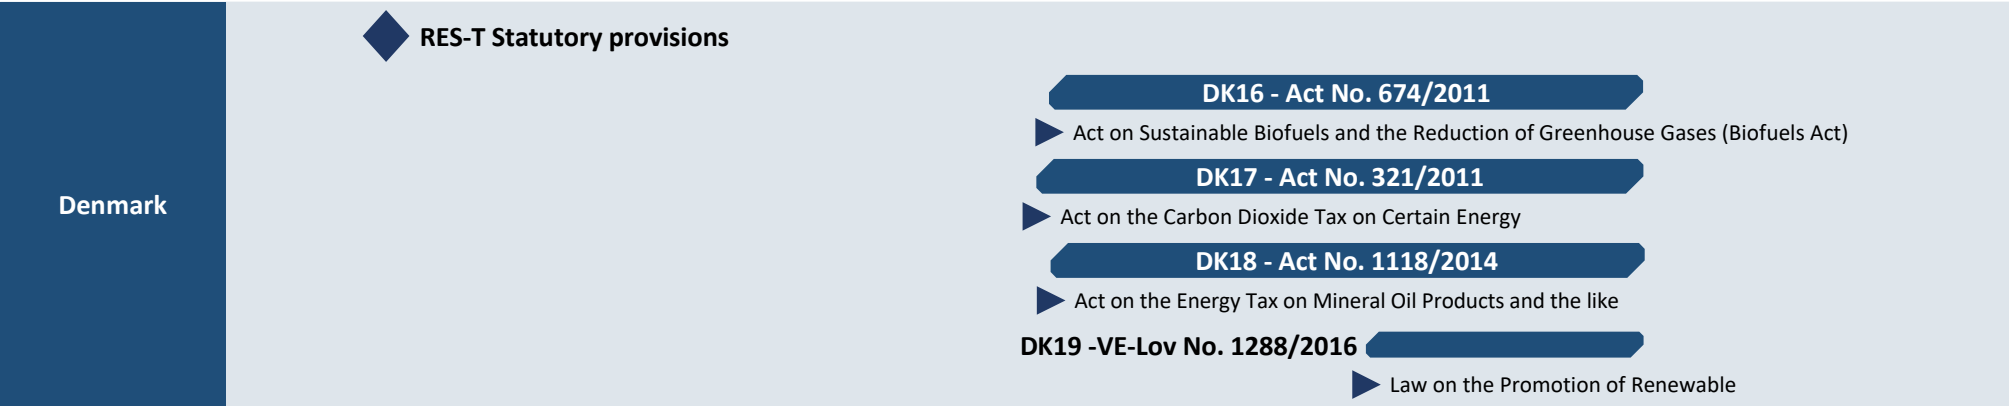

1998

2002

2006

2010

2014

2018

2022

Denmark

## Policies

### DK20 - Act No. 1392/2008

- ▶ Law on the Promotion of Renewable

### DK21 - Act No. 468

- ▶ Law for sustainable biofuels

### DK22 - Executive Order No. 1639

- ▶ Order amending the Order on the sustainability of

### DK23 - Act No. 1607

- ▶ Act amending the Act on Sustainable Biofuels (Duty for importers or producers of petrol, gas or diesel oil to reduce greenhouse gases from transport, etc.)

### DK24 - Executive Order No. 843

- ▶ Order amending the Order on the sustainability of

### DK25 - Act. No. 1498

- ▶ Act amending the Act on electricity supply, Act on natural gas supply, Act on heat supply, Act on subsidies for the promotion of renewable energy in companies' production processes, the Biofuels Act and the Act on the promotion of savings in energy consumption

### DK26 - Act No. 1754

- ▶ Act amending the Act on sustainable biofuels and on the reduction of greenhouse gases from transport

|      |      |      |      |      |      |      |
|------|------|------|------|------|------|------|
| 1998 | 2002 | 2006 | 2010 | 2014 | 2018 | 2022 |
|------|------|------|------|------|------|------|

## Denmark

### ◆ Support schemes - RES-E

DK27 - Loan (Loan guarantees for local initiatives for the construction of wind-energy)

DK28 - Net-

DK29 - Premium tariff (Law on the Promotion of Renewable

DK30 - Tenders (Tender scheme for wind and solar PV)

DK31 - Tenders (Tender scheme pilot project mills)

### ◆ Support schemes - RES-H&C

DK32 - Price-based mechanisms (Premium tariff for

DK33 - Tax regulation mechanism

### ◆ Support schemes - RES-T

DK34 - Biofuel quota (Act on Sustainable Biofuels)

DK35 - Price-based mechanisms (Premium tariff for

DK36 - Tax regulation mechanism

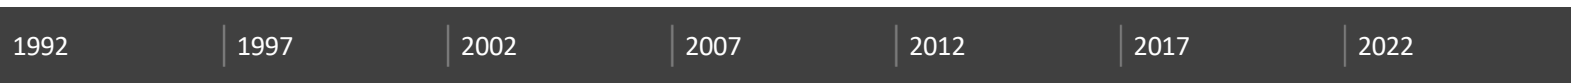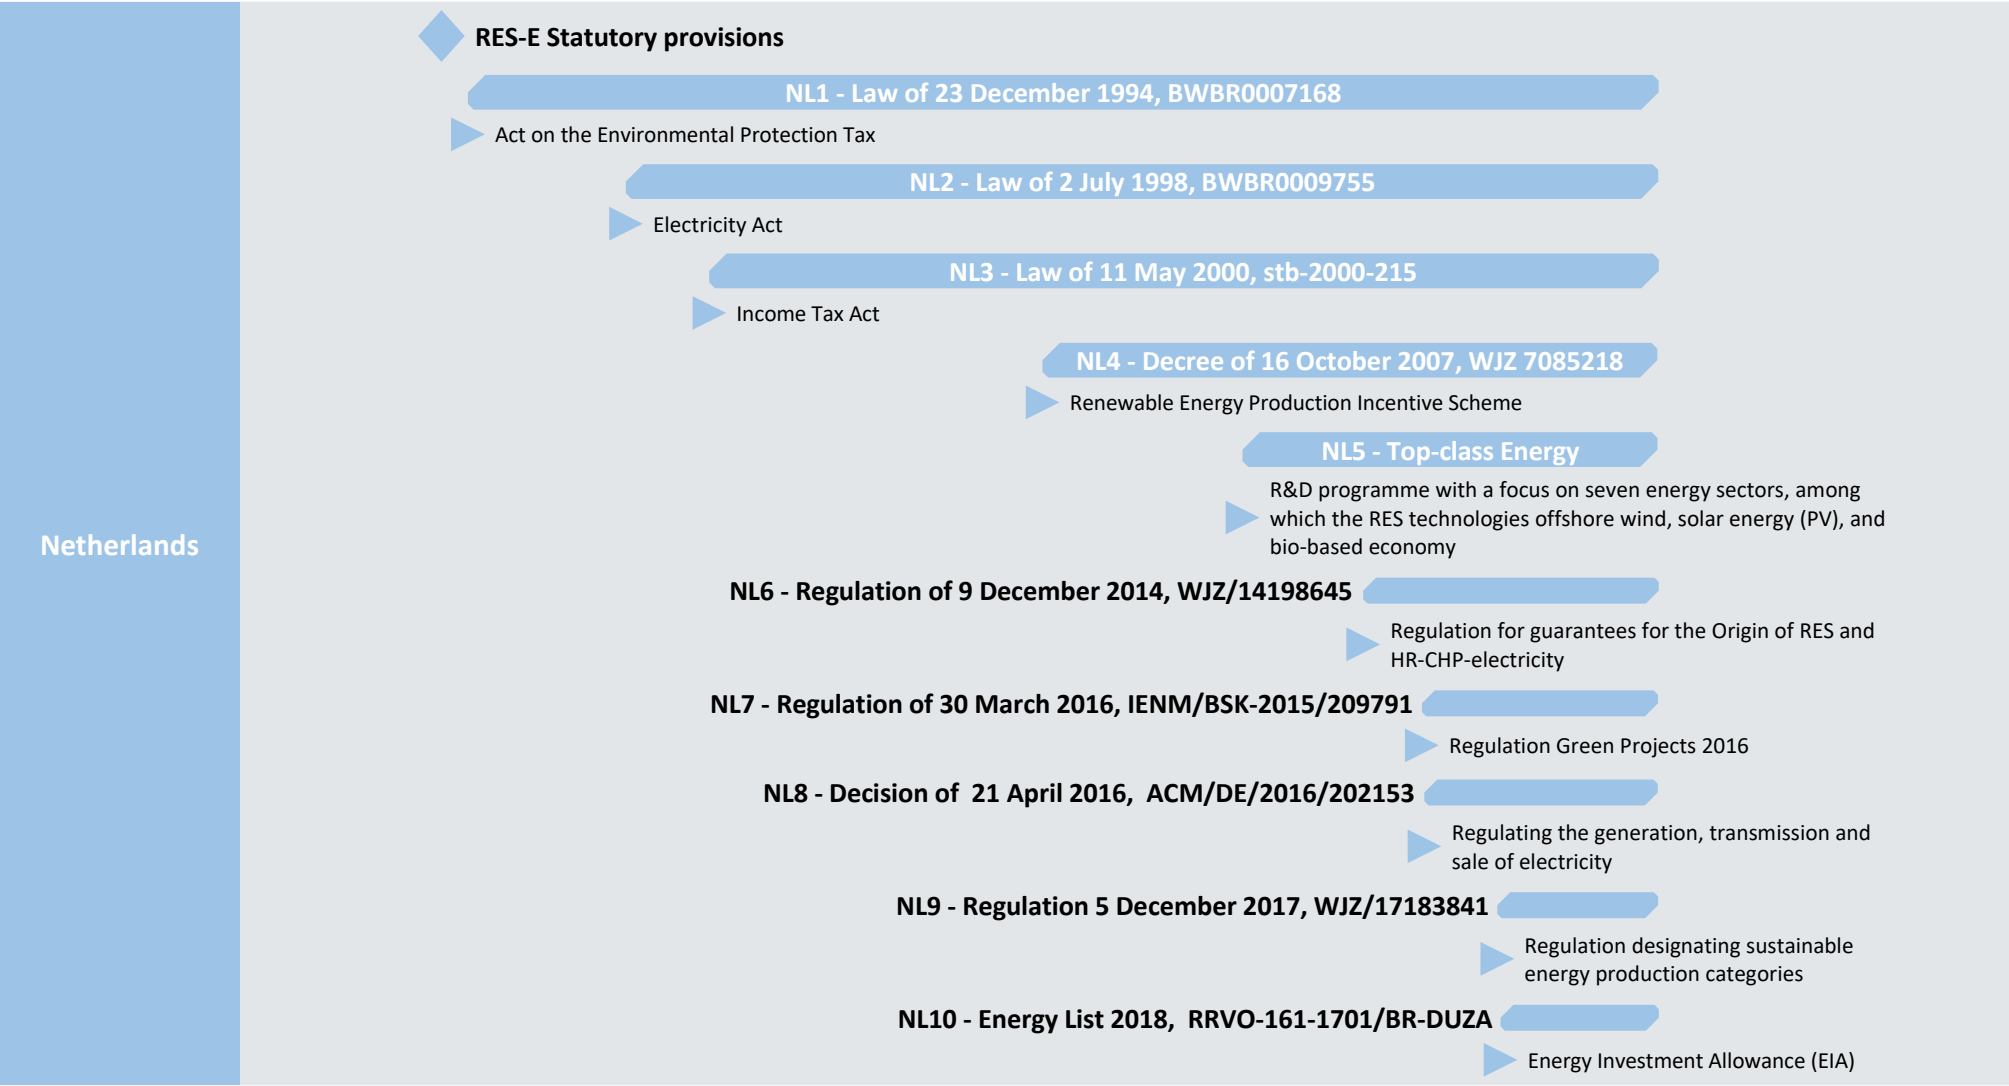

1992

1997

2002

2007

2012

2017

2022

## Netherlands

### ► RES-H&C Statutory provisions

NL11 - Law of 11 May 2000, stb-2000-215

► Income Tax Act

NL12 -Decree of 16 October 2007, WJZ 7085218

► Stimulating sustainable energy production

NL13 - Regulation of 28 February 2008, WJZ 8024263

► Regulation implementing sustainable energy production

NL14 - Regulation of 10 February 2014, WJZ/13177759

► Regulation designating sustainable energy production categories

NL15 - Regulation of 30 March 2016, IENM/BSK-2015/209791

► Regulation Green Projects 2016

NL16 - Energy List 2018, RRVO-161-1701/BR-DUZA

► Energy Investment Allowance (EIA)

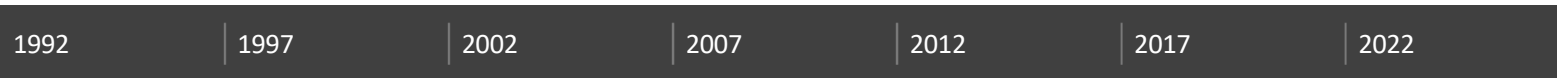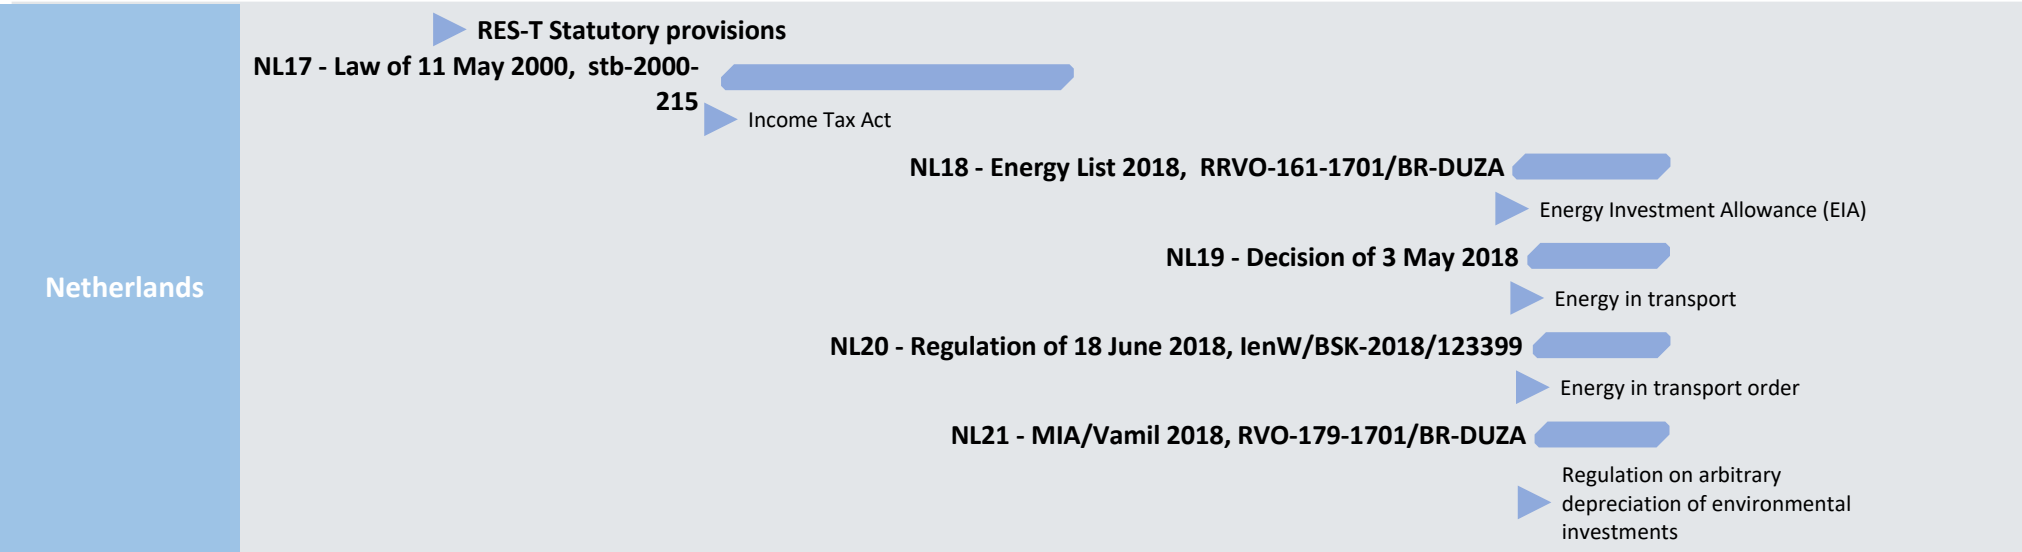

1992

1997

2002

2007

2012

2017

2022

## Netherlands

## ► Policies

## NL22 - Law of 24 March 2011

► Amending the Environmental Management Act, the Economic Offences Act and the Electricity Act

## NL23 - Decree of 18 April 2011

► Renewable energy transport decree

## NL24 - Regulation of 20 April 2011, BJZ2011043268

► Rules regarding the quality and sulfur content of fuels

## NL25 - Regulation of 2 May 2011, BJZ2011044006

► Rules with regard to energy from renewable sources for transport

## NL26 - Law of 26 September 2014

► Amending the Environmental Management Act

## NL27 - Decree of 25 November 2014

► Renewable energy transport decree

## NL28 - Law of 18 April 2018

► Amending the Environment Management Act

## NL29 - Decision of 3 May 2018

► Containing rules regarding the annual renewable energy transport obligation and the reporting and reduction obligation for transport emission

1992

1997

2002

2007

2012

2017

2022

## Netherlands

### ◆ Support schemes - RES-E

NL30 - Loan

NL31 - Net-Metering

NL32 - Premium tariff  
(SDE+)

NL33 - Tax regulation mechanisms I (Reduction of environmental protection tax)

NL34 - Tax regulation mechanisms II (Energy Investment Allowance, EIA scheme)

NL35 - Tenders (SDE+ for offshore wind energy)

### ◆ Support schemes - RES-H&C

NL36 - Loan

NL37 - Premium tariff

(SDE+)  
NL38 - Subsidy (ISDE)

NL39 - Tax regulation mechanism (Energy Investment Allowance, EIA scheme)

### ◆ Support schemes - RES-T

NL40 - Biofuel quota

NL41 - Tax regulation mechanism I (Energy Investment Allowance, EIA scheme)

NL42 - Tax regulation mechanism II (MIA/VAMIL scheme)



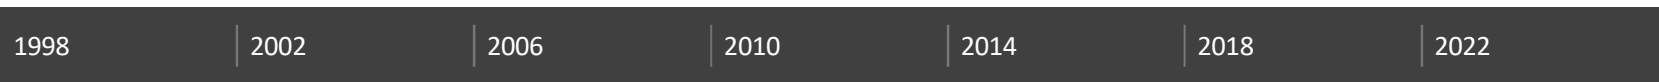

Ireland

◆ RES-E Statutory provisions

**IE13 - REFIT 3 (Renewable Energy Feed-in Tariff 2012)**

- ▶ Terms and conditions for the payment of the Renewable Energy Feed in Tariff to electricity produced from biomass technologies

**IE14 - REFIT 2 (Renewable Energy Feed-in Tariff 2012)**

- ▶ Terms and conditions for the payment of the Renewable Energy Feed in Tariff to electricity produced from wind, small hydro and biomass landfill gas technologies

**IE15 - SEMC/03/10**

- ▶ Decision Paper on the Treatment of wind Curtailment in Tie-break situations

**IE16 - Offshore Renewable Energy Development Plan (OREDPA)**

- ▶ Framework for the sustainable development of Ireland's offshore renewable energy resource

**IE17 - S.I. No. 426/2014**

- ▶ European Communities (Energy End-Use Efficiency And Energy Services) Regulations 2014

**IE18 - S.I. No. 483/2014**

- ▶ European Union (Renewable Energy) Regulations

**IE19 - REFIT 1 (Renewable Energy Feed-in Tariff 2006)**

- ▶ Supports the construction of renewable energy plants

**IE20 - CER/16/284**

- ▶ Transitional provisions concerning grid connection policy for renewables

**IE21 - CER/17/090**

- ▶ Connection Policy Transitional Arrangements Partial Capacity Release

**IE22 - CER 18/158**

- ▶ Provisions according which new RES plants will be granted access to the grid

**IE23 - "Solar PV Pilot Scheme" Guid**

- ▶ Subsidy for the purchase of a PV installation and battery storage

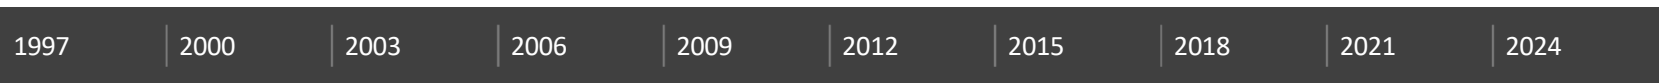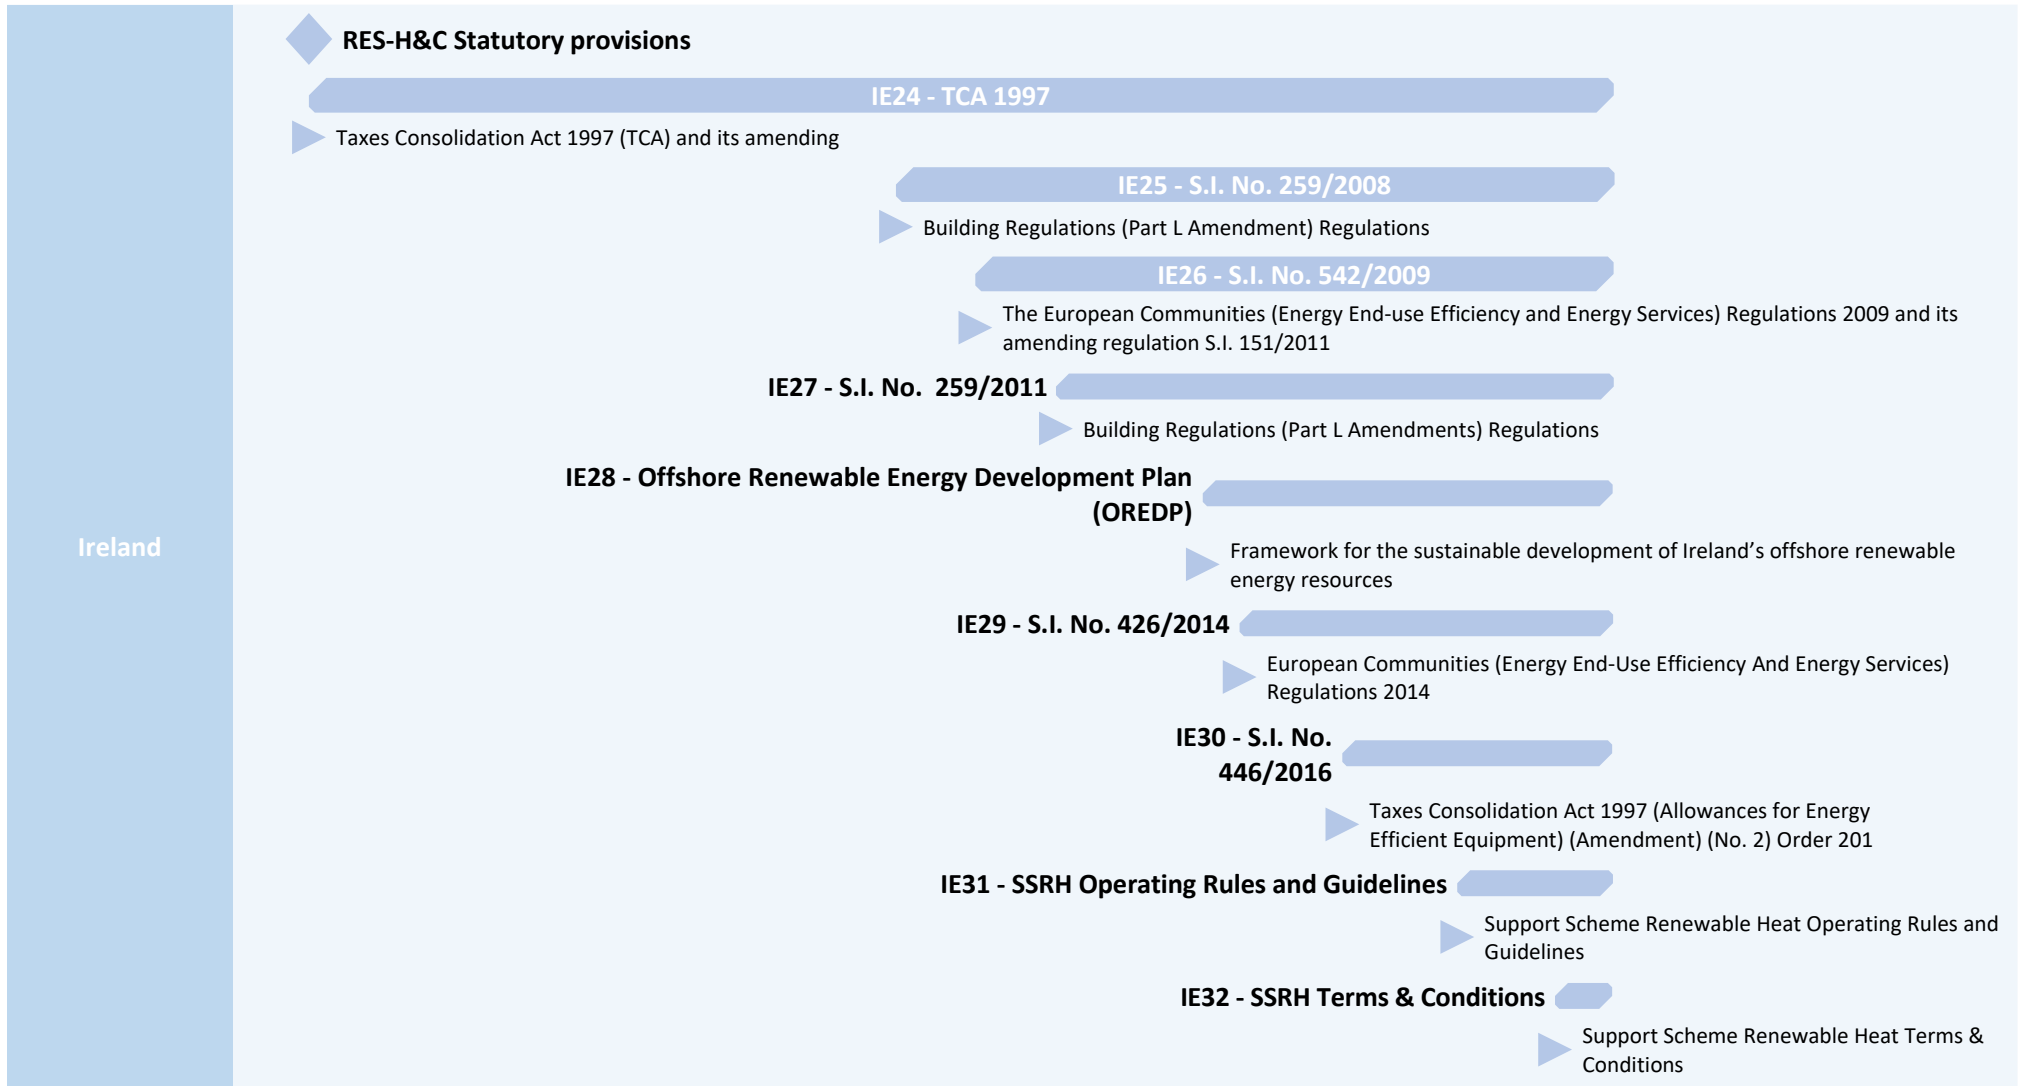

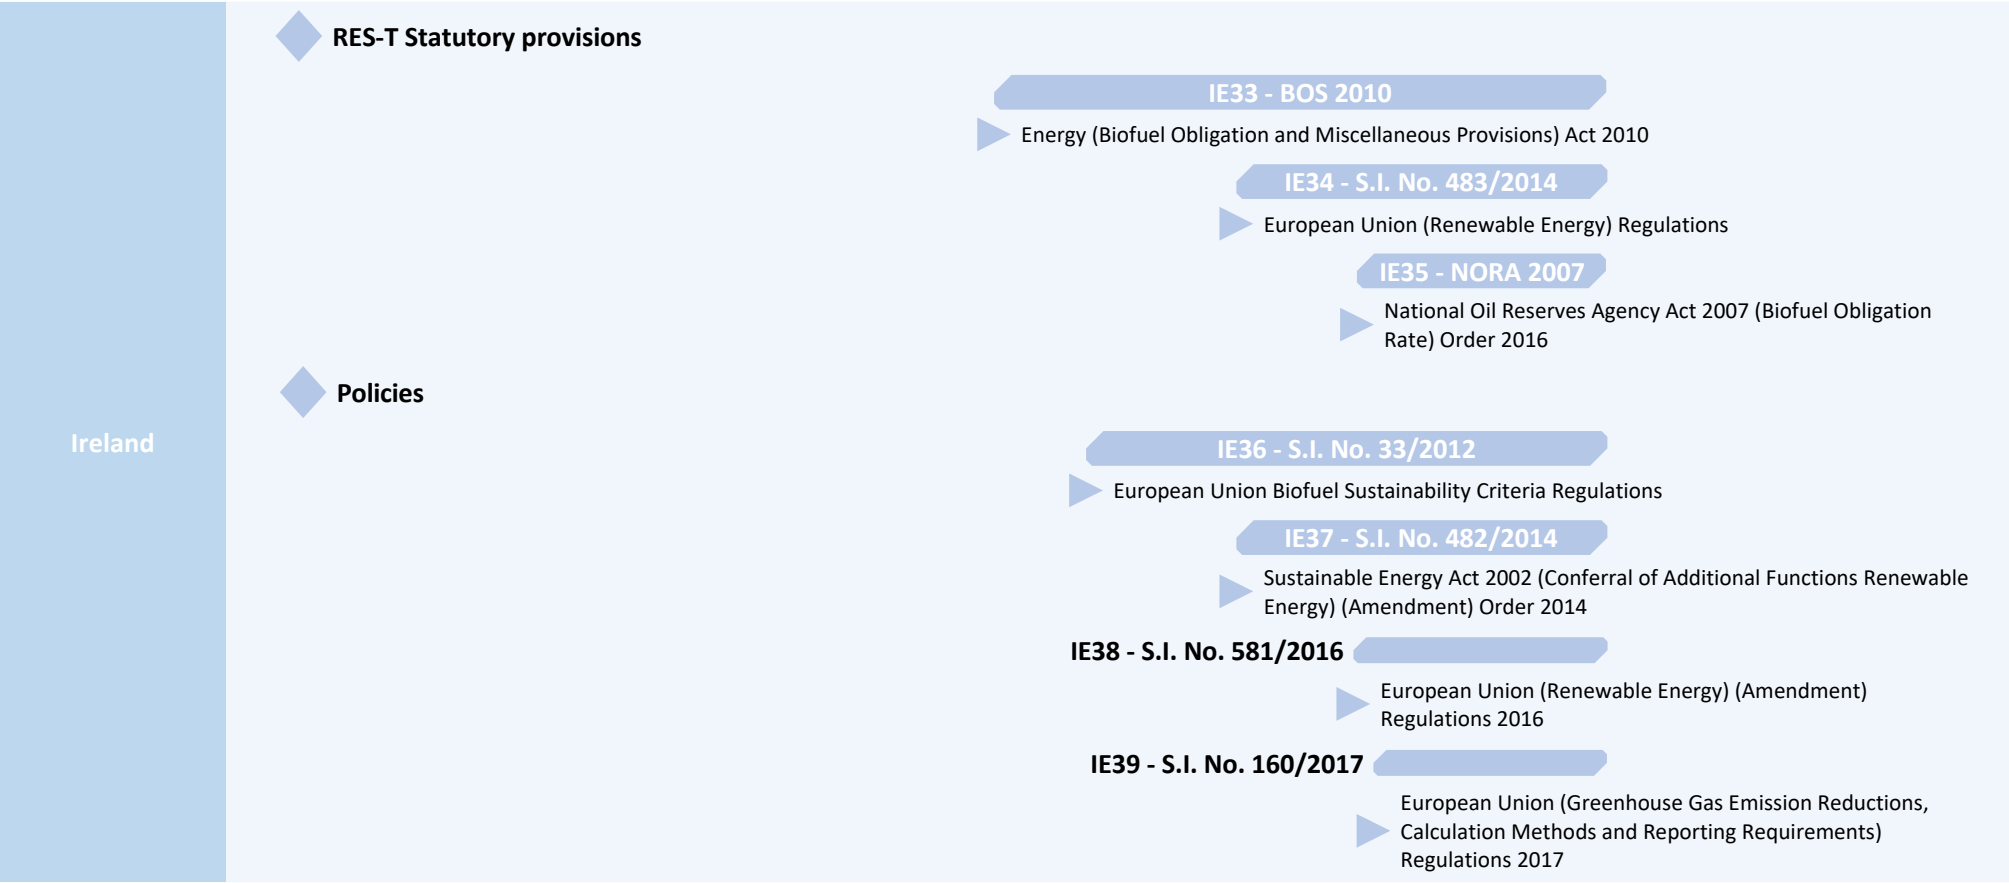

|      |      |      |      |      |      |      |      |      |      |
|------|------|------|------|------|------|------|------|------|------|
| 1997 | 2000 | 2003 | 2006 | 2009 | 2012 | 2015 | 2018 | 2021 | 2024 |
|------|------|------|------|------|------|------|------|------|------|

Ireland

◆ **Support schemes - RES-E**

IE40 - Feed-in tariff (Renewable Energy Feed-in Tariff - REFIT)

IE41 - Subsidy ("Solar PV Pilot Scheme")

◆ **Support schemes - RES-H&C**

IE42 - Subsidy I (Better Energy Homes Scheme-Solar Water Heating Grant)

IE43 - Subsidy II (Support Scheme Renewable Heat)

IE44 - Tax regulation mechanism (Accelerated Capital Allowance scheme)

◆ **Support schemes - RES-T**

IE45 - Biofuel quota (Biofuels Obligation Scheme - BOS)

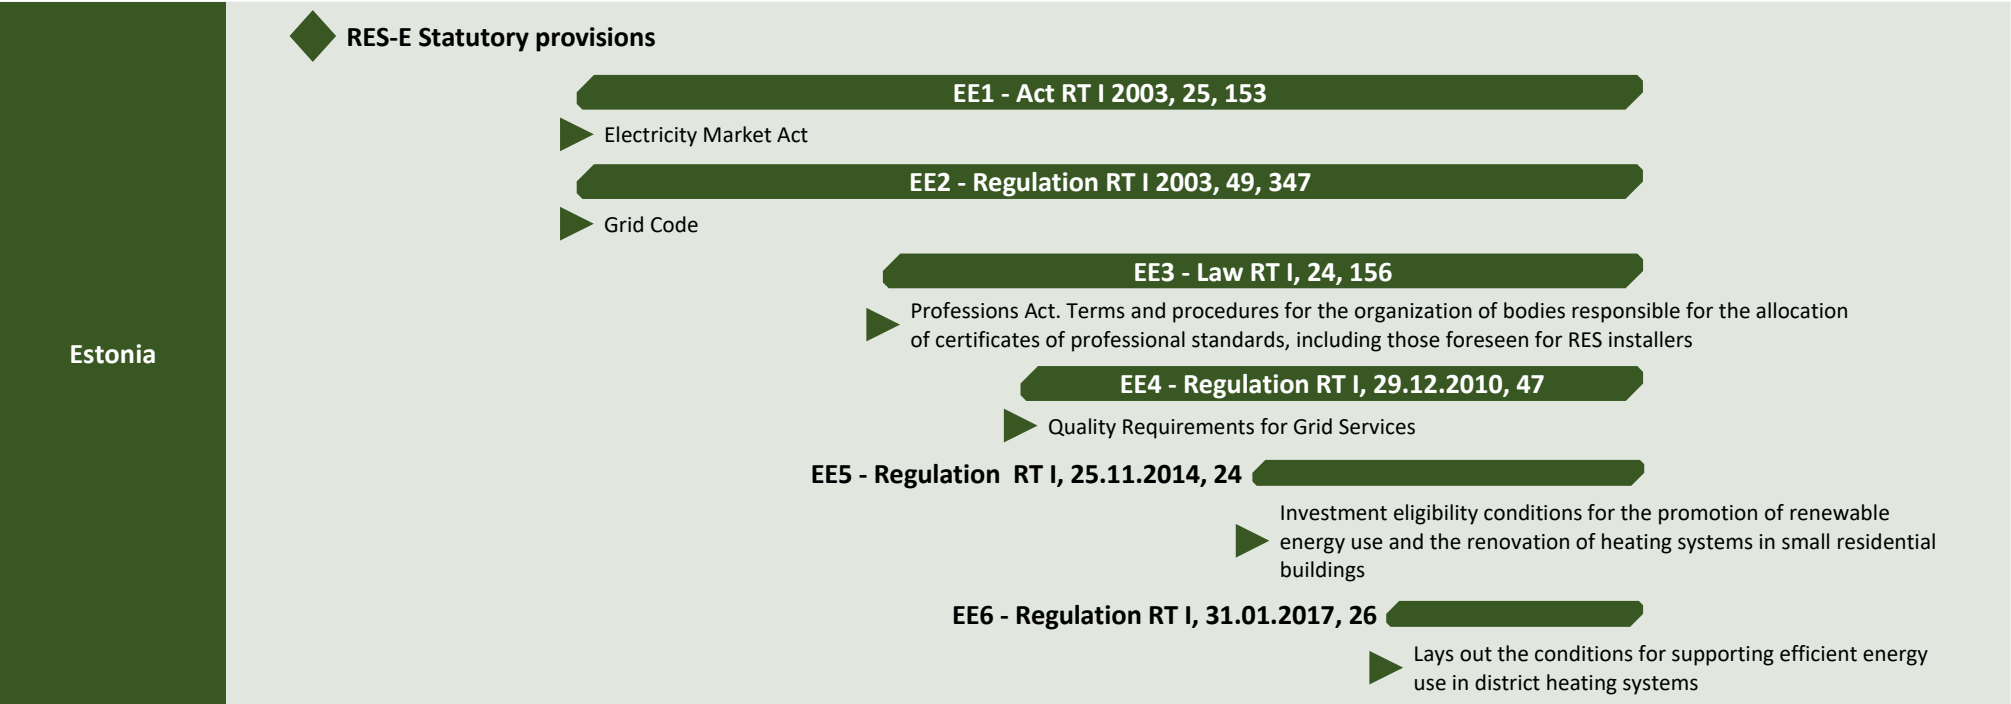



Estonia

◆ RES-H&C Statutory provisions

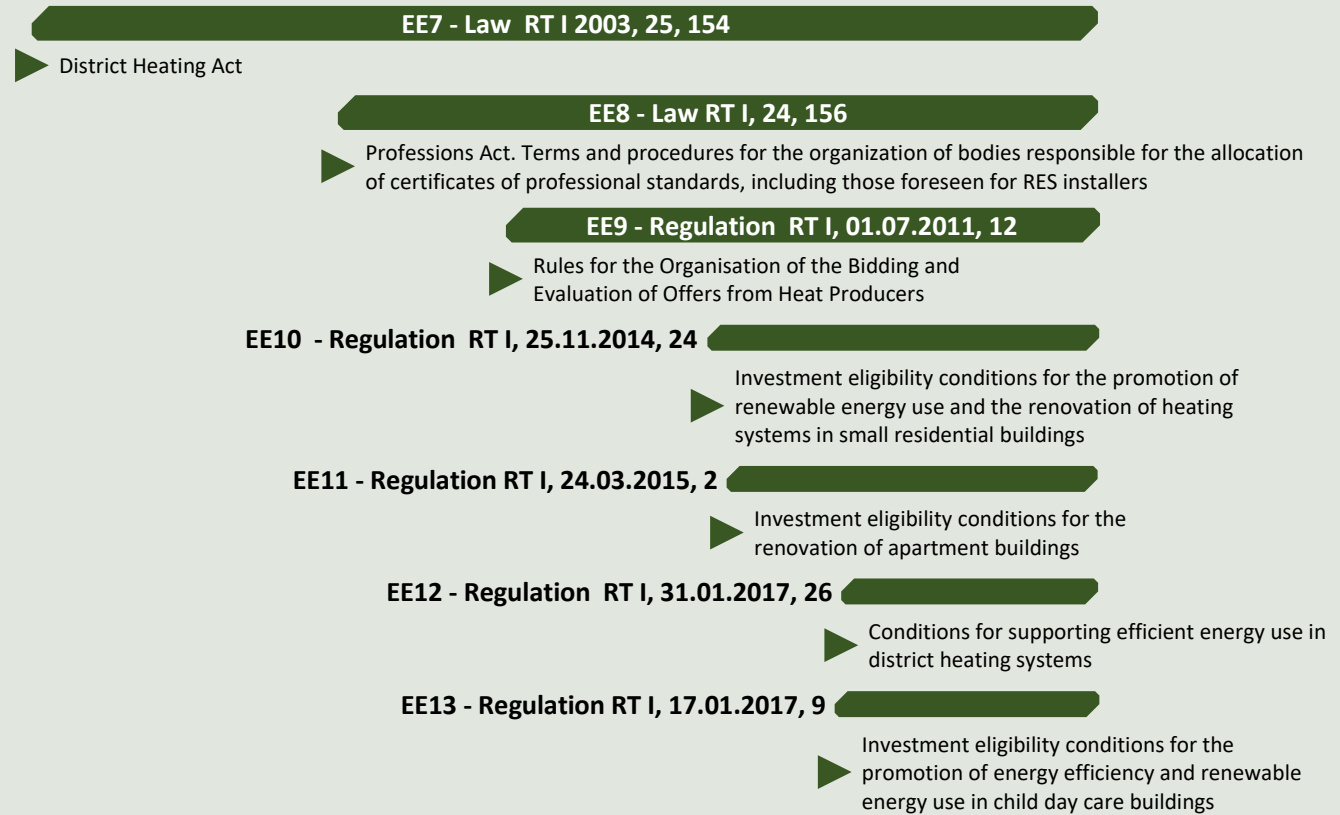

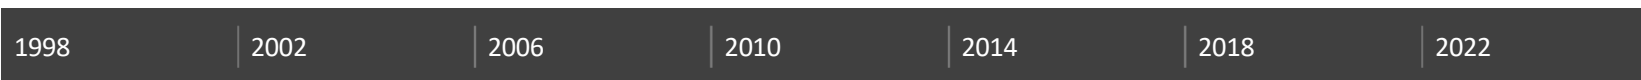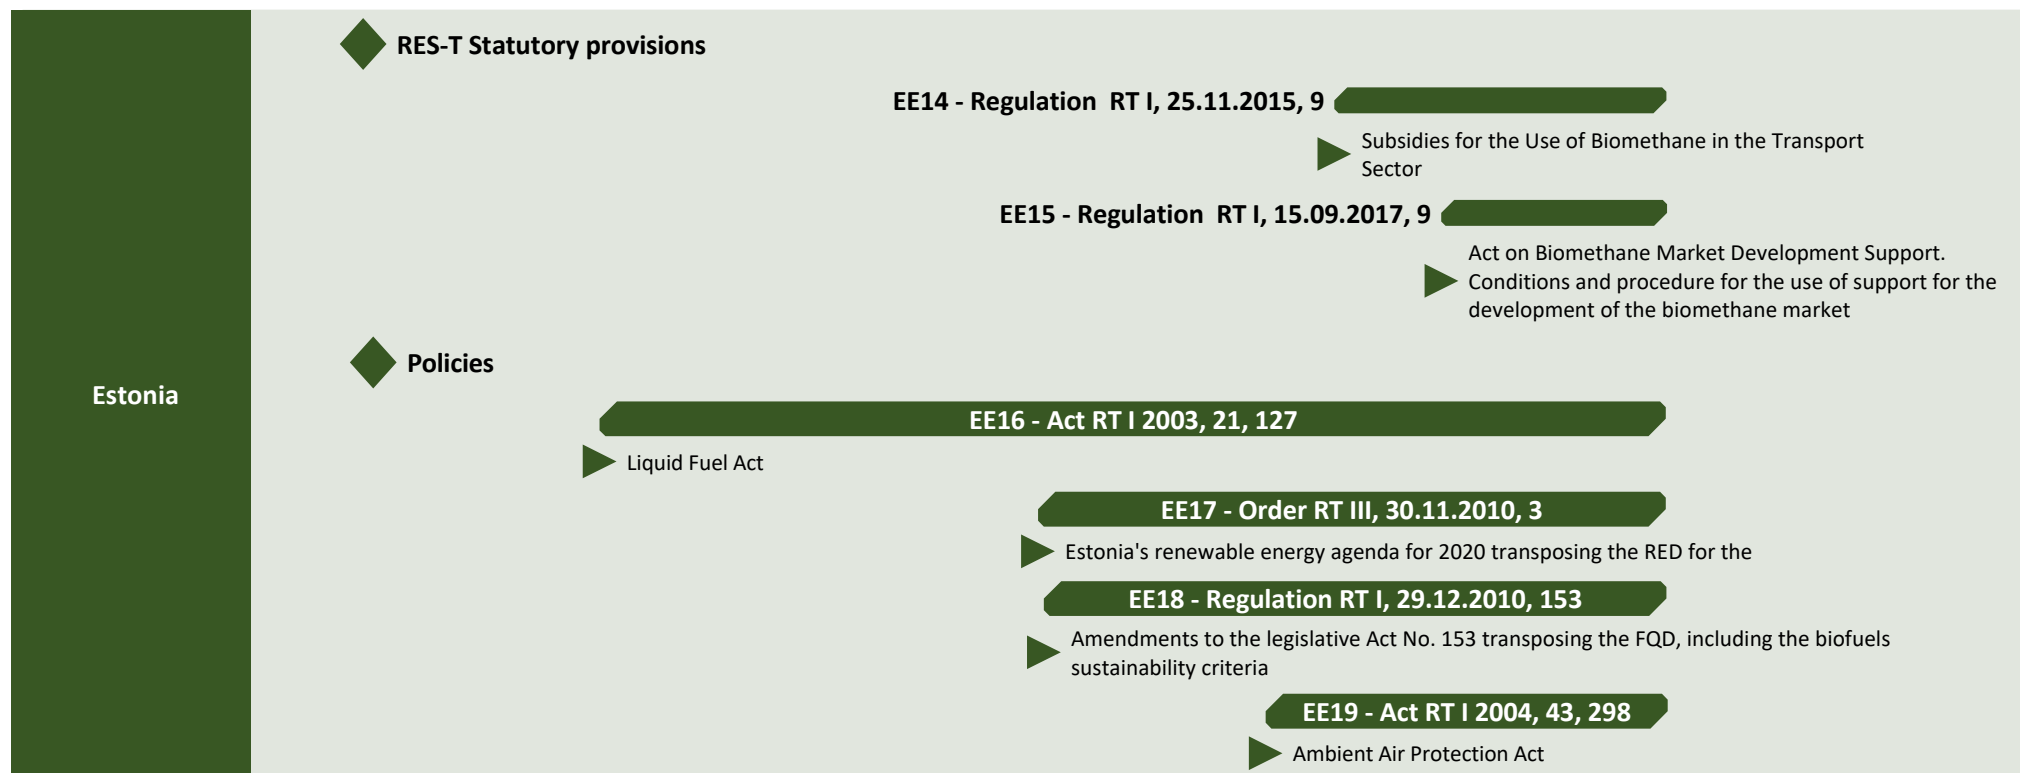

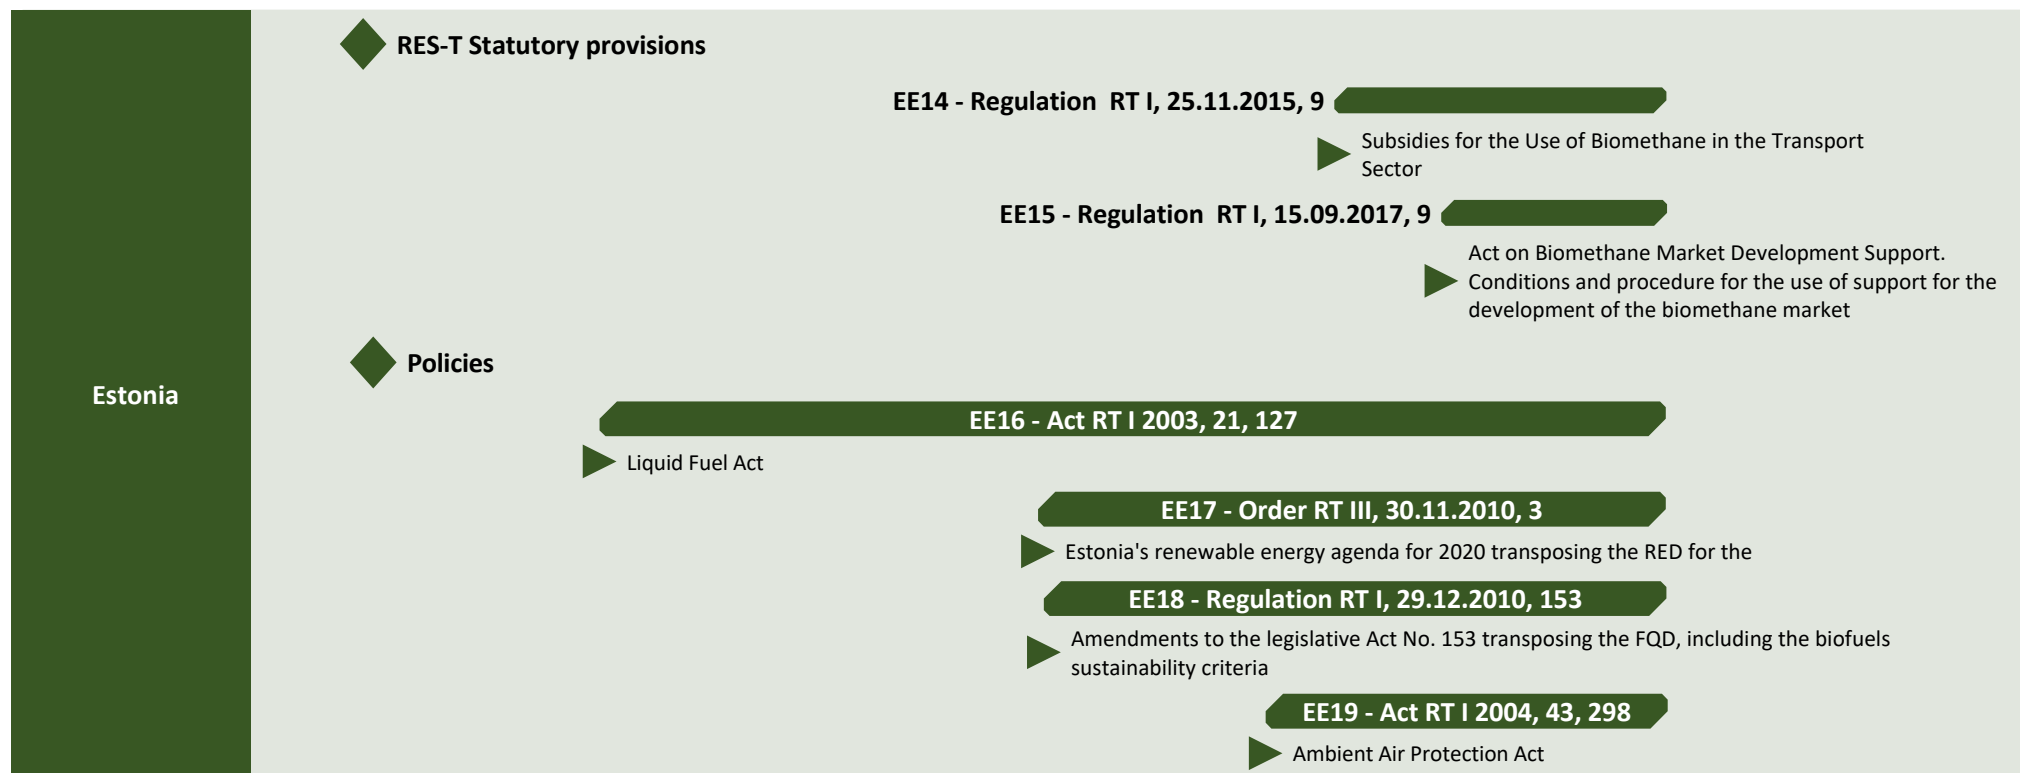

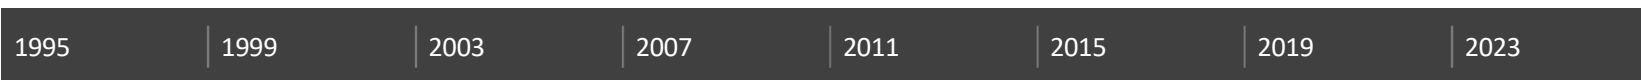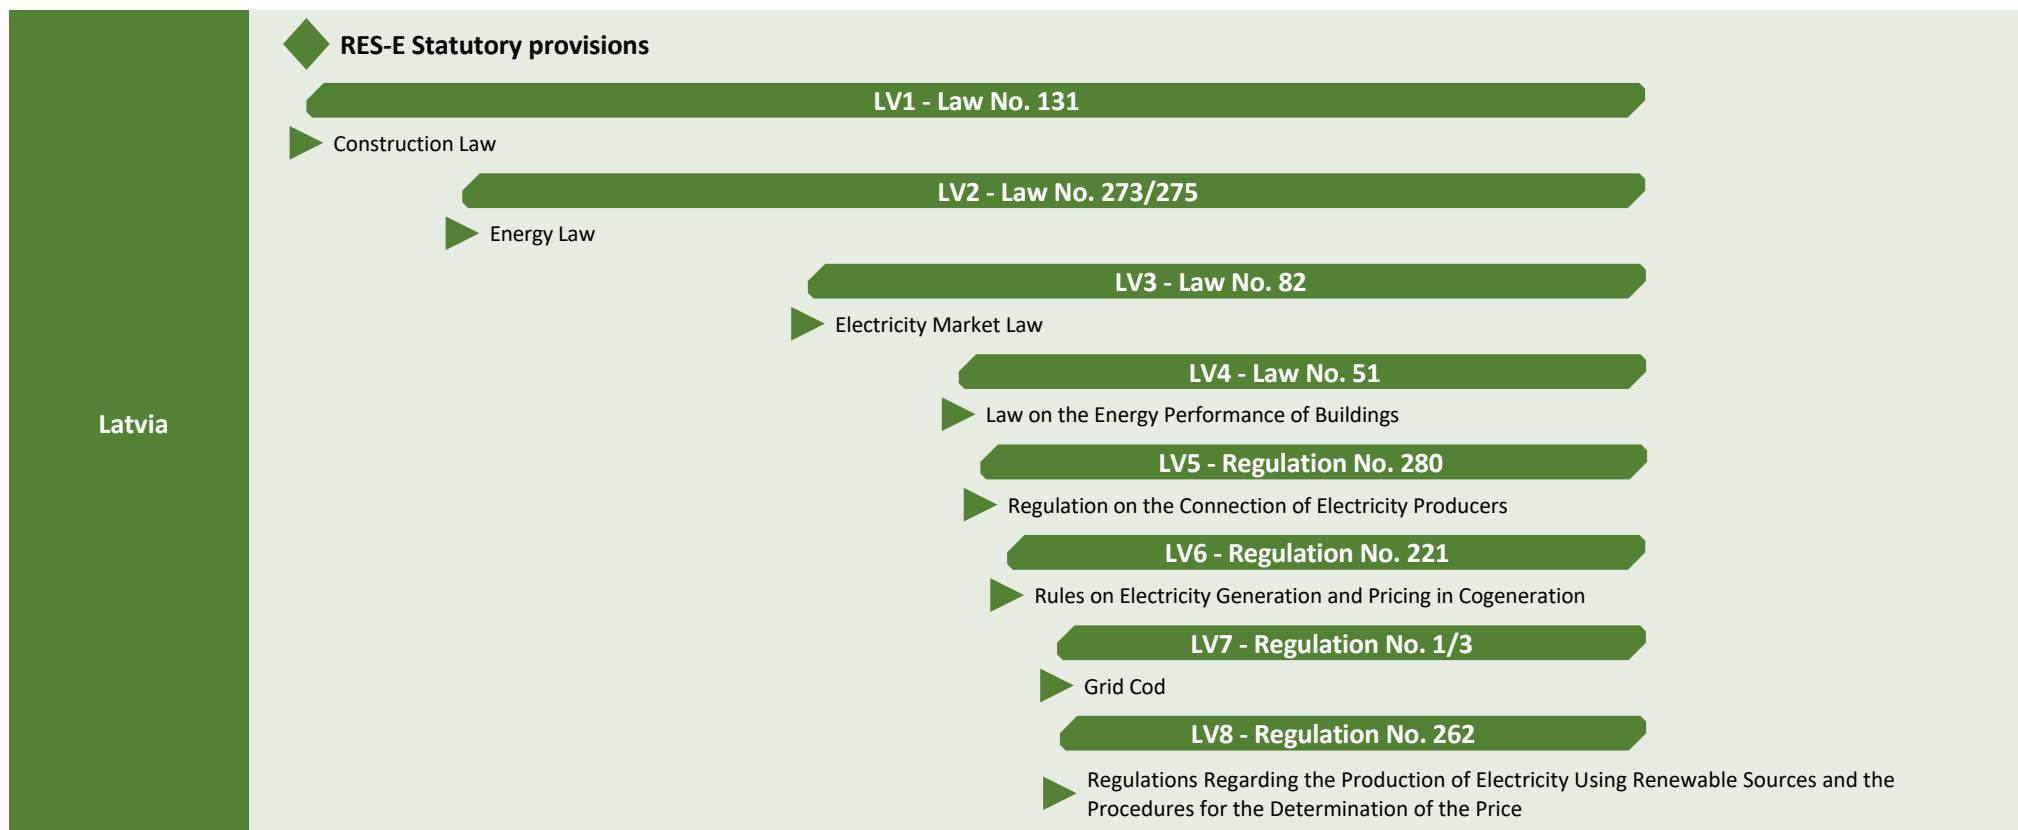

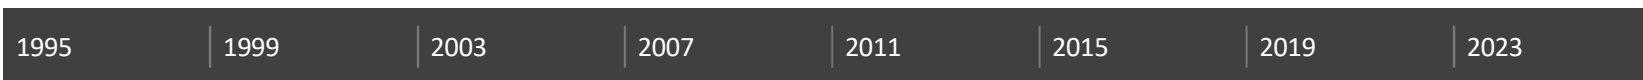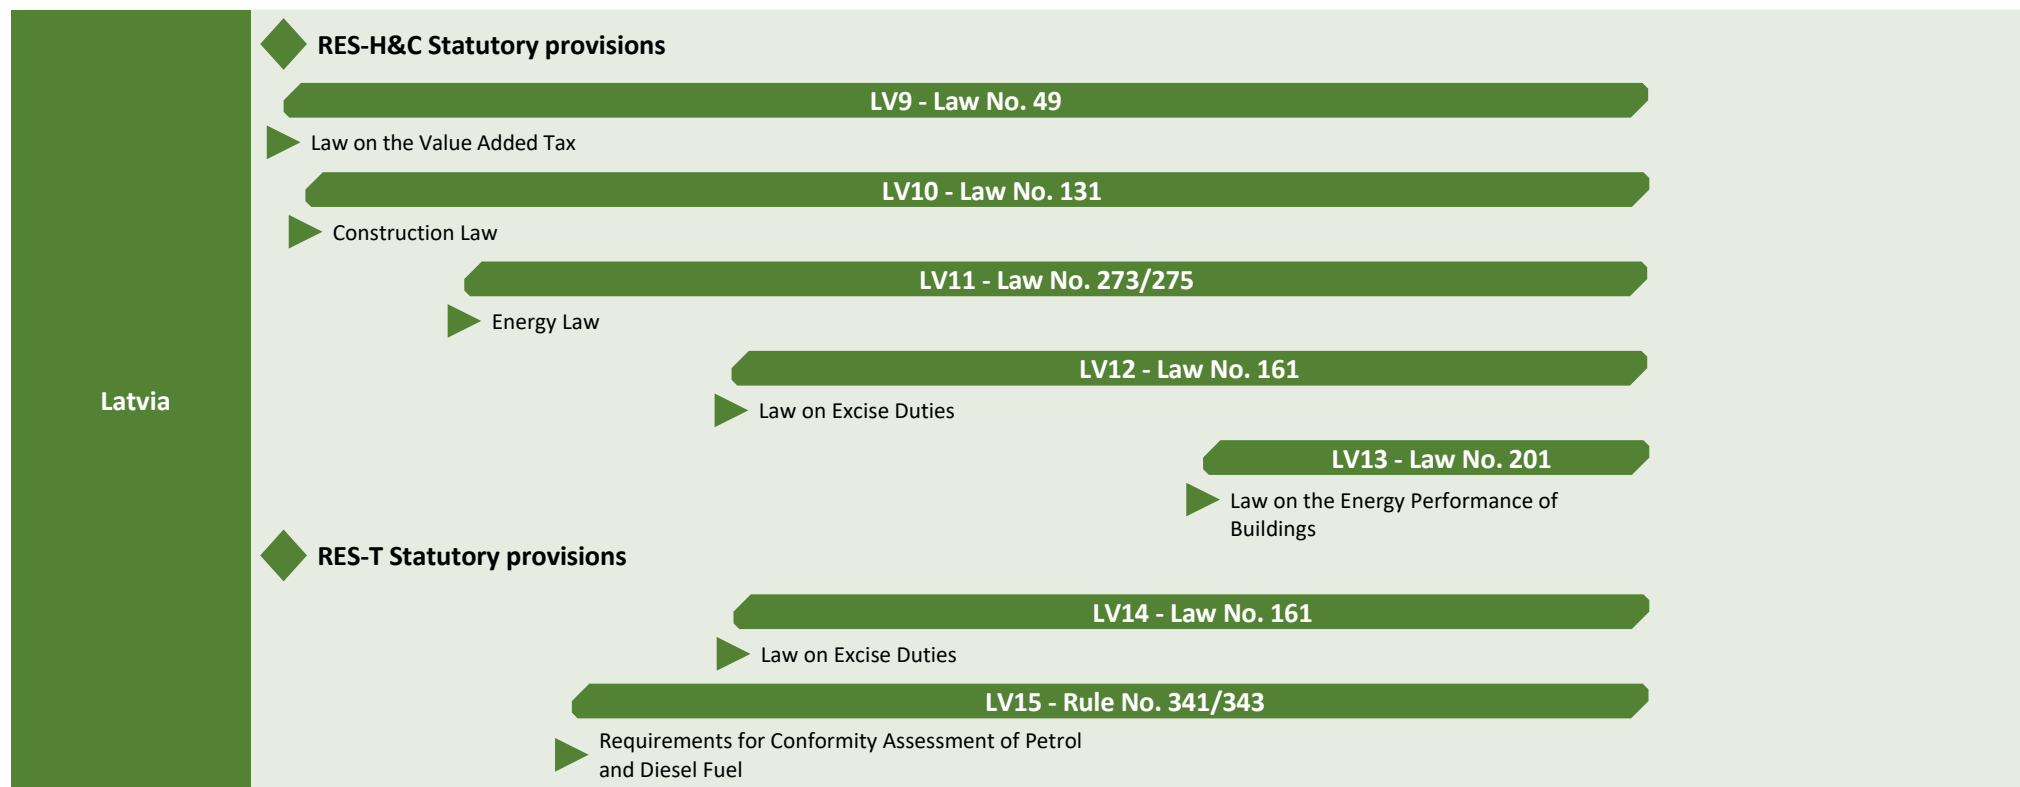

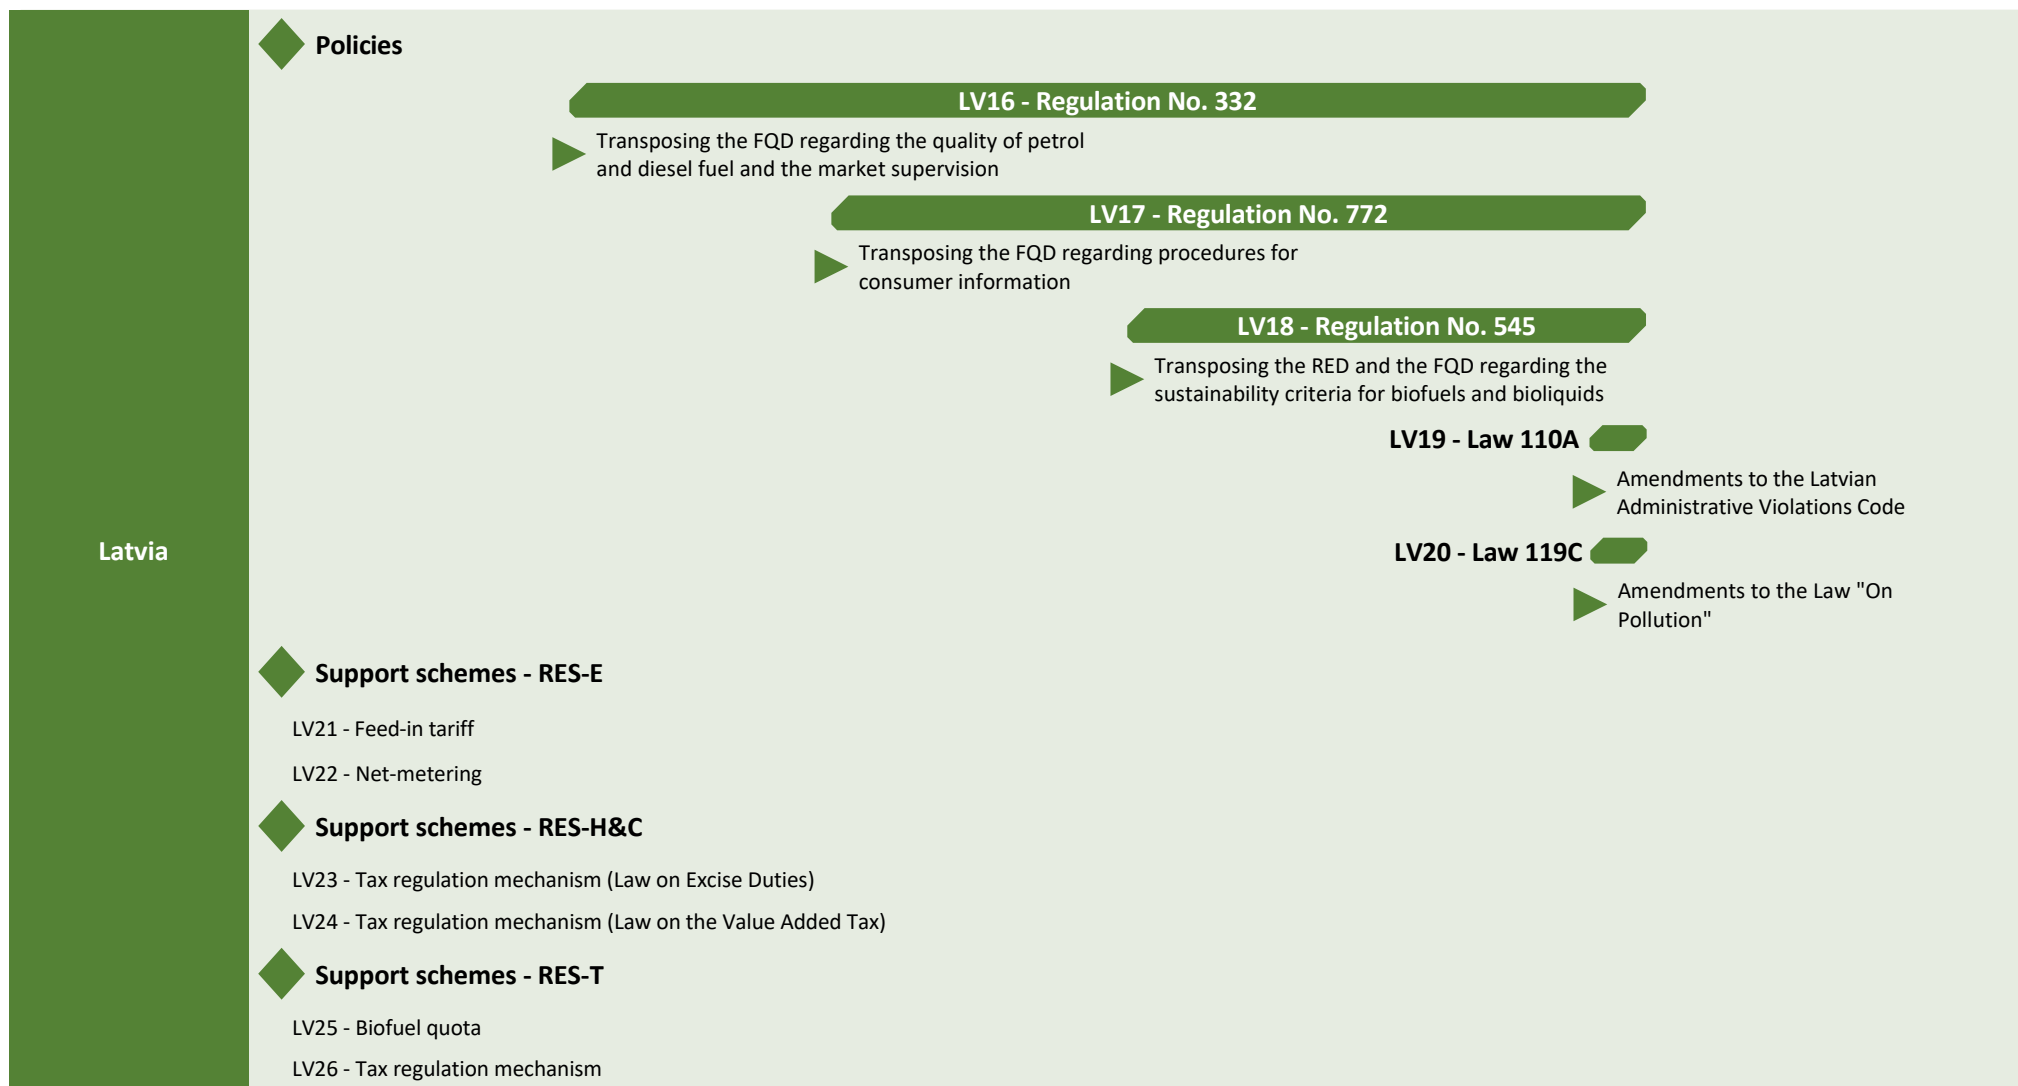

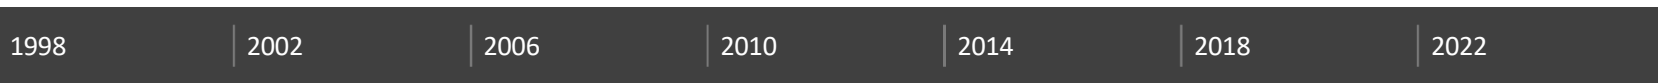

Lithuania

RES-E Statutory provisions

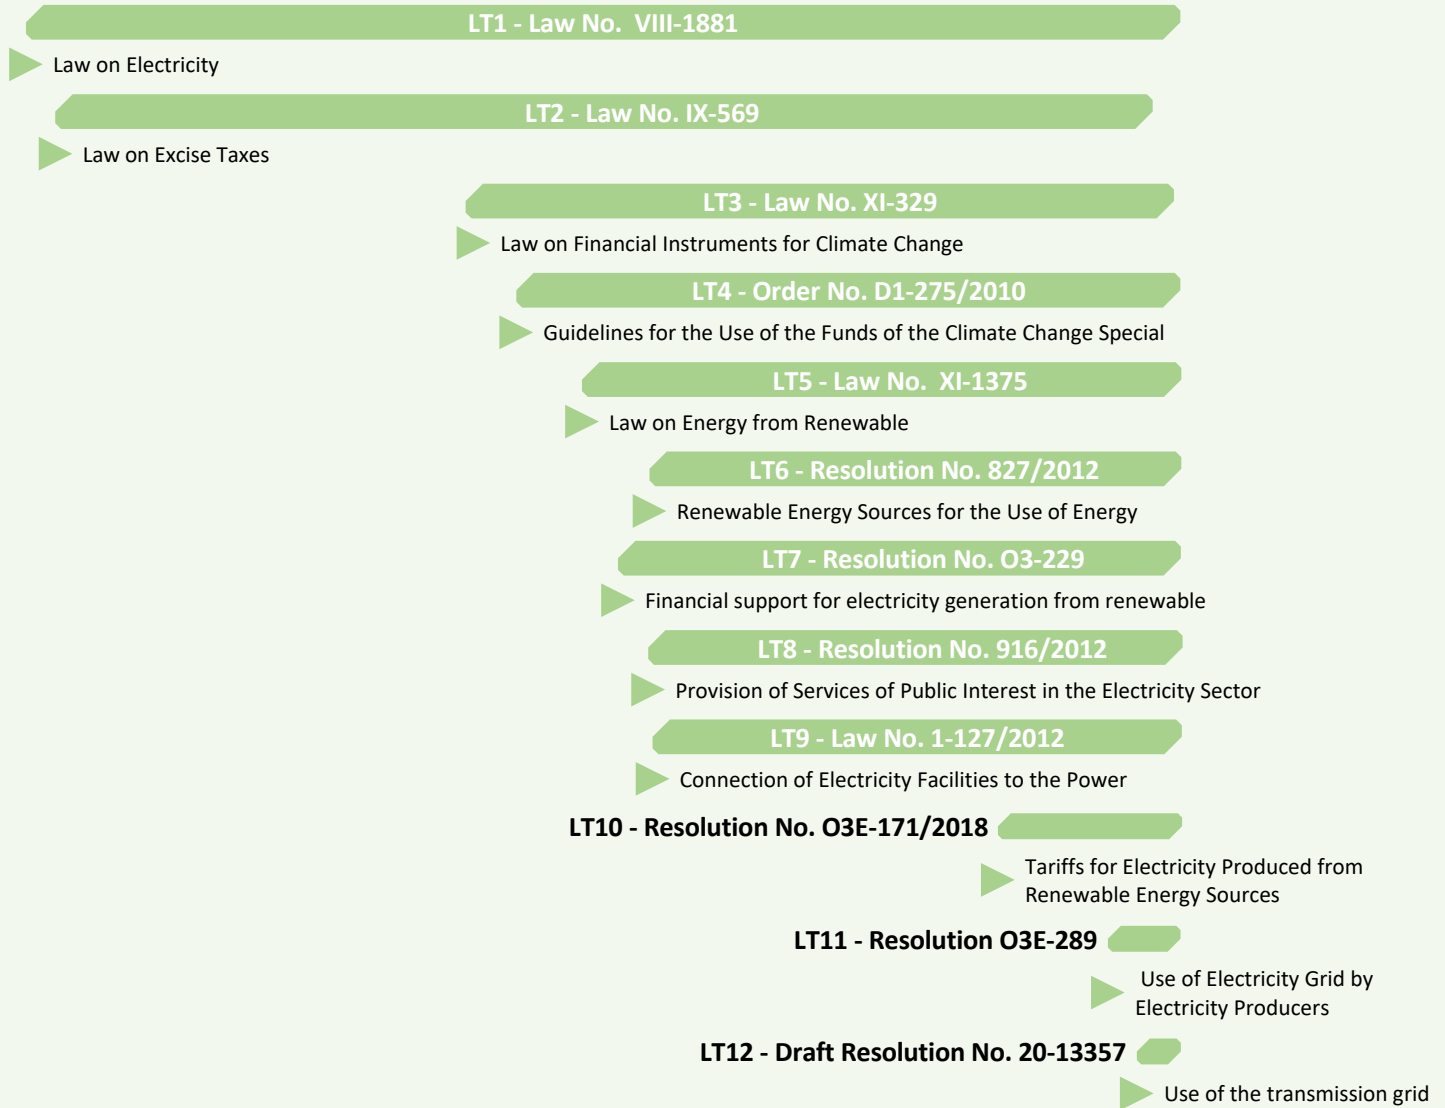

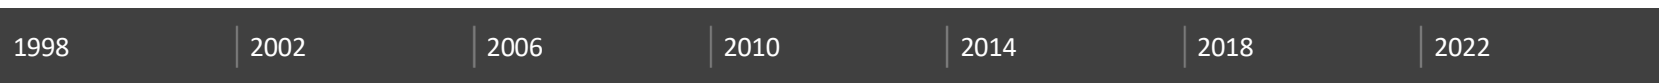

Lithuania

◆ **RES-H&C Statutory provisions**

**LT13 - Law No. VIII-1183**

▶ Law on Environmental Pollution Taxes

**LT14 - Law No. IX-1005**

▶ Law on State Environmental Control

**LT15 - Law No. IX-1565**

▶ Law on Heat Sector

**LT16 - Second Document of Order No. D1-370/1K-230**

▶ Procedure of Calculation and Payment of Environmental Pollution Taxes for Stationary Sources

**LT17 - Law No. XI-329**

▶ Law on Financial Instruments for Climate Change

**LT18 - Resolution No. O3-96/2009**

▶ Heat Pricing Methodology

**LT19 - Order No. D1-275/2010**

▶ Guidelines for the Use of the Funds of the Climate Change Special

**LT20 - Law No. XI-1375**

▶ Law on Energy from Renewable  
Sources

**LT21 - Order No. 1-115/2012**

▶ Connection of new natural gas systems, direct pipelines and biogas plants to the  
existing natural gas transmission or distribution systems

**LT22 - Resolution No. O3-437/2013**

▶ Recognition of Independent Heat Producers as Unregulated Heat

**LT23 - Order No. D1-259/2014**

▶ Rules on the Issue, Amendment and Withdrawal of Pollution

**LT24 - Resolution No. O3-396/2016**

▶ Tariff rates for 2017 for the purchase of biogas

**LT25 - Resolution No. O3E-74/2013**

▶ Conditions to purchase of heat from  
producers

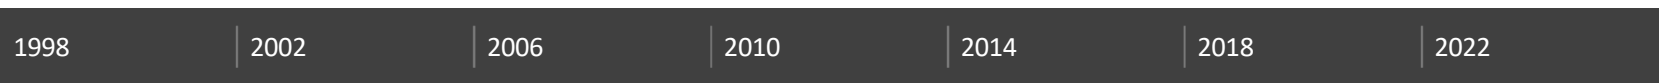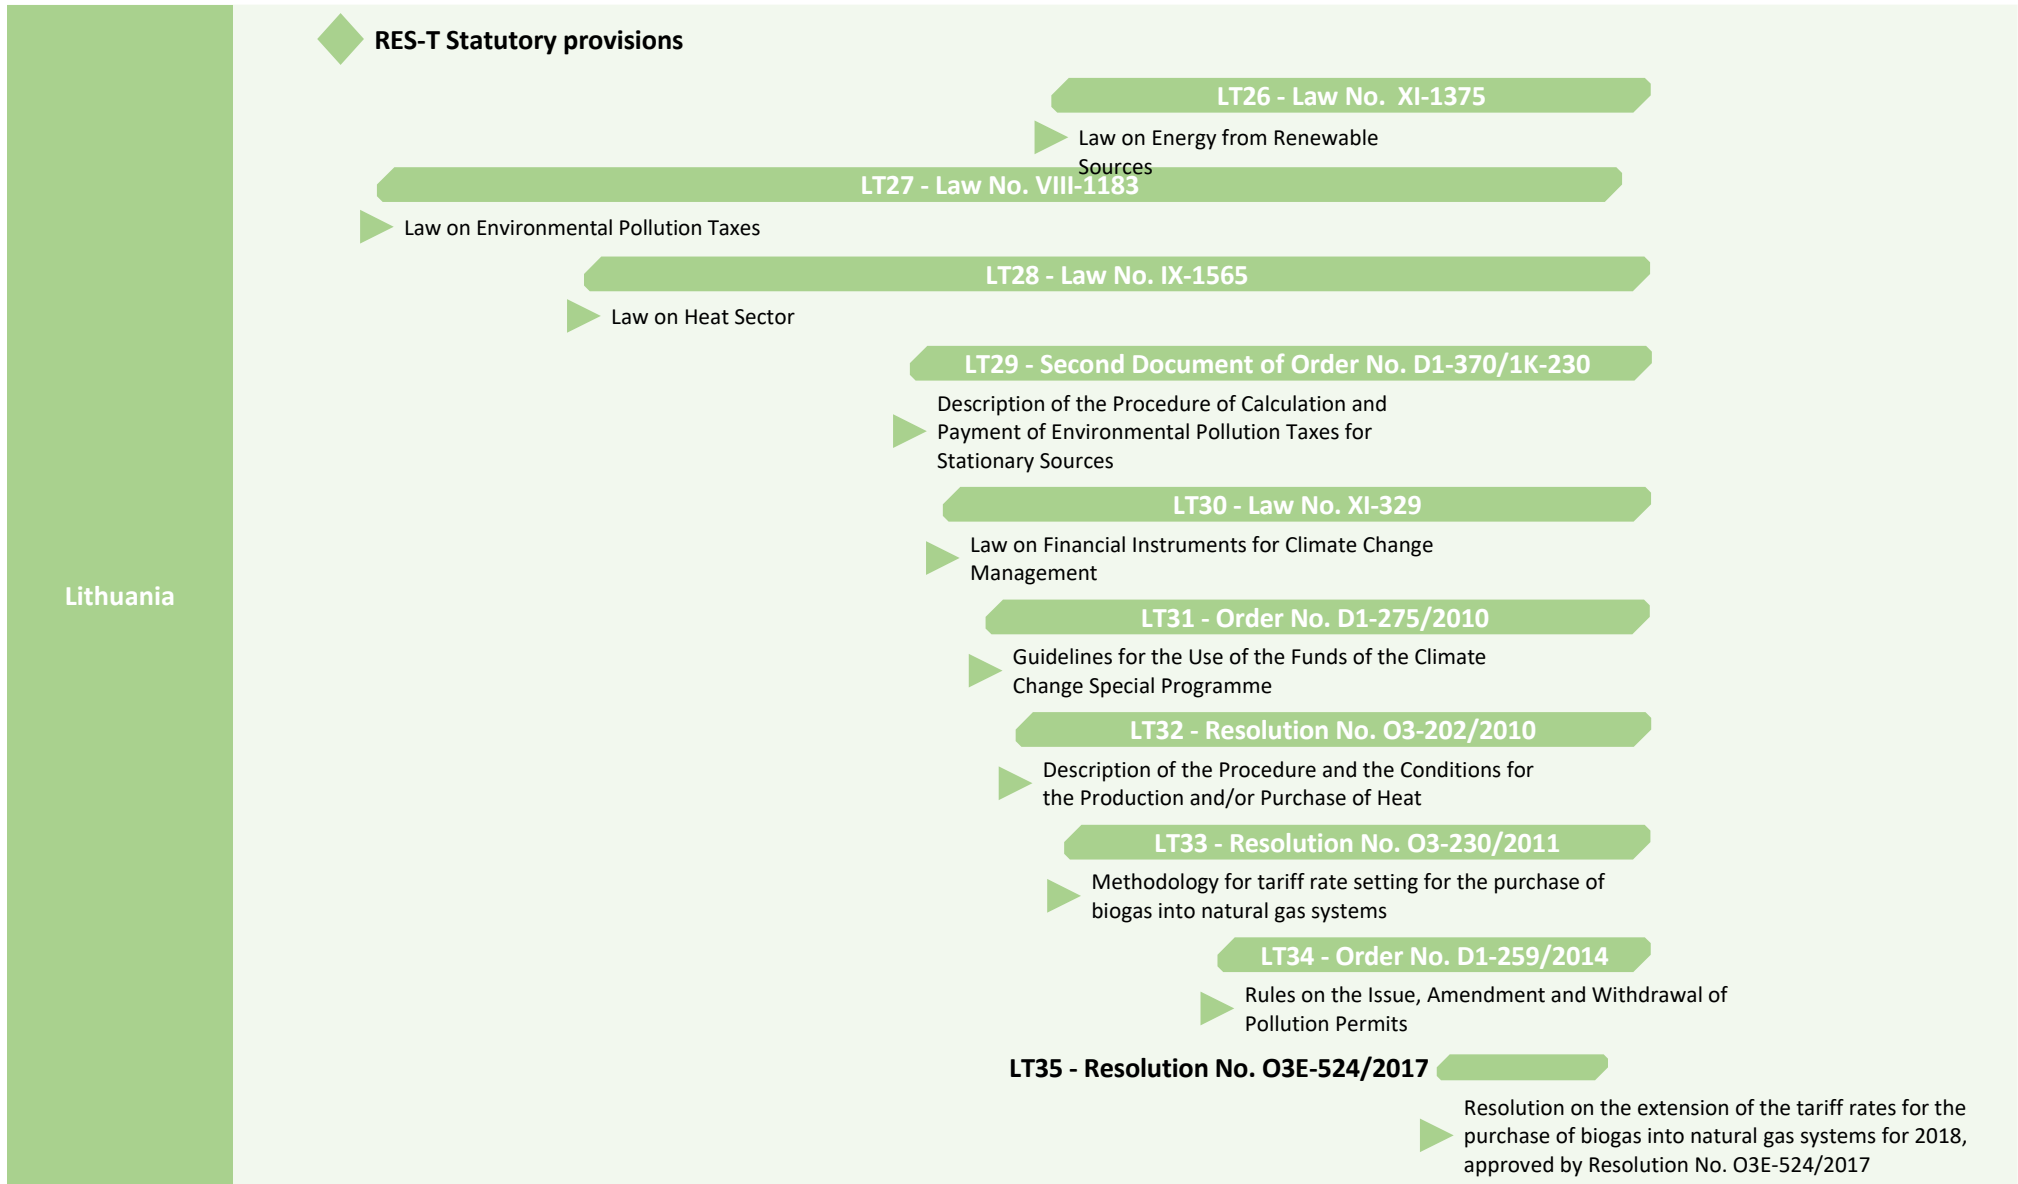

|      |      |      |      |      |      |      |      |
|------|------|------|------|------|------|------|------|
| 1995 | 1999 | 2003 | 2007 | 2011 | 2015 | 2019 | 2023 |
|------|------|------|------|------|------|------|------|

## Lithuania

### ◆ Policies

#### LT36 - Decree No. 1-348 / D1-1014 / 3-742

- ▶ Approval of mandatory quality indicators for petroleum products, biofuels and liquid fuels used

#### LT37 - Order D1-2

- ▶ Ryles for the calculation of greenhouse gas emissions from the production and use of biofuels, bioliquids and comparative fossil fuels

### ◆ Support schemes - RES-E

- LT38 - Loan (Climate Change Special Programme)
- LT39 - Net-Metering (Law on Energy from Renewable Sources)
- LT40 - Sliding feed-in premium (Law on Energy from Renewable Sources)
- LT41 - Subsidy (Climate Change Special Programme)
- LT42 - Subsidy (LEIF)
- LT43 - Tax regulation mechanisms (Relief from Excise Duty)
- LT44 - Tenders (Sliding feed-in premium)

### ◆ Support schemes - RES-H&C

- LT45 - Feed-in Tariff for biogas injected into the natural gas system (Law on Energy from Renewable Sources)
- LT46 - Loan (Climate Change Special Programme)
- LT47 - Price-based mechanisms (Priority purchase of heat produced from
- LT48 - Subsidy (Climate Change Special Programme)
- LT49 - Tax regulation mechanism (Exemption from the Environmental Pollution Tax)

### ◆ Support schemes - RES-T

- LT50 - Quota obligation (Law on Energy from Renewable Sources)
- LT51 - Subsidy (National Paying Agency under the Ministry of Agriculture)
- LT52 - Tax regulation mechanism (Law on Environmental Pollution Taxes)
- LT53- Tax regulation mechanism (Relief from Excise Duty)
